# Supplementary material for: Redox properties of polyoxometalates: new insights on the anion charge effect
Source: Royal Society of Chemistry journal article supplement (doi:10.1039/b507599h), 2005-11-10
Supplement: b507599h.pdf [file b507599h.pdf]

# **Redox Properties of Polyoxometalates: New Insights on the Anion Charge Effect**

**Xavier López,<sup>a</sup> Jorge A. Fernández,<sup>b</sup> and Josep M. Poble<sup>b\*</sup>**

*<sup>a</sup>Laboratoire de Chimie Quantique, UMR 7551, CNRS and Université Louis Pasteur, 4 rue  
Blaise Pascal, F-67000 Strasbourg, France*

*<sup>b</sup>Departament de Química Física i Inorgànica, Universitat Rovira i Virgili, Marcel·lí Domingo  
s/n, 43007 Tarragona, Spain*

**Supplementary Material**

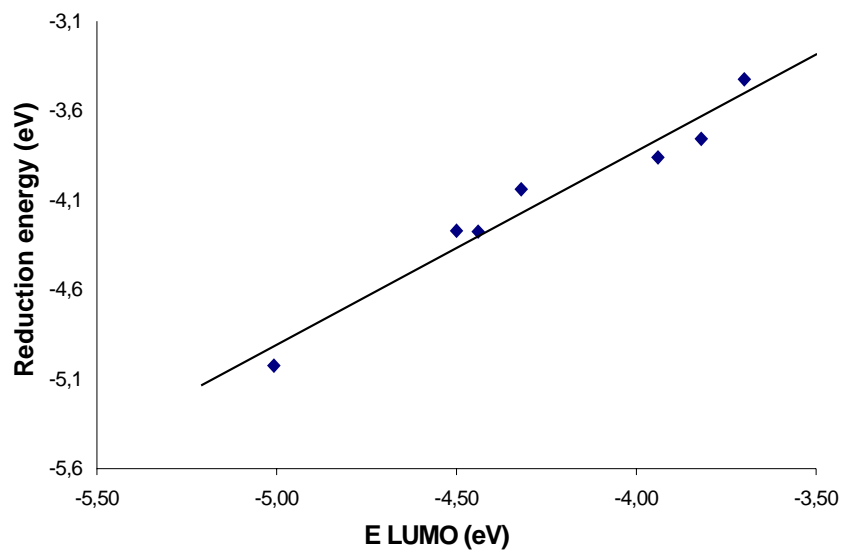

Figure S1. Correlation between the reduction energy and the LUMO's energy for several polyoxotungstates

TABLE S1. XYZ coordinates for several optimized structures  
Lindqvist  $W_6O_{19}^{2-}$  O(h)

|   |           |           |           |
|---|-----------|-----------|-----------|
| O | 0.000000  | 0.000000  | 0.000000  |
| W | 2.357780  | 0.000000  | 0.000000  |
| W | 0.000000  | 2.357780  | 0.000000  |
| W | -2.357780 | 0.000000  | 0.000000  |
| W | 0.000000  | -2.357780 | 0.000000  |
| W | 0.000000  | 0.000000  | 2.357780  |
| W | 0.000000  | 0.000000  | -2.357780 |
| O | 1.888314  | 1.888314  | 0.000000  |
| O | -1.888314 | 1.888314  | 0.000000  |
| O | -1.888314 | -1.888314 | 0.000000  |
| O | 1.888314  | -1.888314 | 0.000000  |
| O | 0.000000  | 1.888314  | 1.888314  |
| O | 0.000000  | -1.888314 | 1.888314  |
| O | 0.000000  | -1.888314 | -1.888314 |
| O | 0.000000  | 1.888314  | -1.888314 |
| O | -1.888314 | 0.000000  | 1.888314  |
| O | 1.888314  | 0.000000  | 1.888314  |
| O | 1.888314  | 0.000000  | -1.888314 |
| O | -1.888314 | 0.000000  | -1.888314 |

|   |           |           |           |
|---|-----------|-----------|-----------|
| O | 4.086808  | 0.000000  | 0.000000  |
| O | -4.086808 | 0.000000  | 0.000000  |
| O | 0.000000  | 0.000000  | 4.086808  |
| O | 0.000000  | 0.000000  | -4.086808 |
| O | 0.000000  | 4.086808  | 0.000000  |
| O | 0.000000  | -4.086808 | 0.000000  |

Keggin  $\text{SiW}_{12}\text{O}_{40}^{4-}$  T(d)

|    |           |           |           |
|----|-----------|-----------|-----------|
| Si | 0.000000  | 0.000000  | 0.000000  |
| W  | 2.529611  | 2.529611  | 0.116025  |
| W  | -2.529611 | 2.529611  | -0.116025 |
| W  | -2.529611 | -2.529611 | 0.116025  |
| W  | 2.529611  | -2.529611 | -0.116025 |
| W  | 0.116025  | 2.529611  | 2.529611  |
| W  | -0.116025 | -2.529611 | 2.529611  |
| W  | 0.116025  | -2.529611 | -2.529611 |
| W  | -0.116025 | 2.529611  | -2.529611 |
| W  | -2.529611 | 0.116025  | -2.529611 |
| W  | 2.529611  | -0.116025 | -2.529611 |
| W  | 2.529611  | 0.116025  | 2.529611  |
| W  | -2.529611 | -0.116025 | 2.529611  |
| O  | 0.950378  | 0.950378  | 0.950378  |
| O  | -0.950378 | 0.950378  | -0.950378 |
| O  | -0.950378 | -0.950378 | 0.950378  |
| O  | 0.950378  | -0.950378 | -0.950378 |
| O  | 1.146732  | 1.146732  | -2.994402 |
| O  | -1.146732 | 1.146732  | 2.994402  |
| O  | -1.146732 | -1.146732 | -2.994402 |
| O  | 1.146732  | -1.146732 | 2.994402  |
| O  | -2.994402 | 1.146732  | 1.146732  |
| O  | 2.994402  | -1.146732 | 1.146732  |
| O  | -2.994402 | -1.146732 | -1.146732 |
| O  | 2.994402  | 1.146732  | -1.146732 |
| O  | -1.146732 | -2.994402 | -1.146732 |
| O  | 1.146732  | 2.994402  | -1.146732 |
| O  | 1.146732  | -2.994402 | 1.146732  |
| O  | -1.146732 | 2.994402  | 1.146732  |
| O  | 1.513802  | 1.513802  | 3.415138  |
| O  | -1.513802 | 1.513802  | -3.415138 |
| O  | -1.513802 | -1.513802 | 3.415138  |
| O  | 1.513802  | -1.513802 | -3.415138 |
| O  | 3.415138  | 1.513802  | 1.513802  |
| O  | -3.415138 | -1.513802 | 1.513802  |
| O  | 3.415138  | -1.513802 | -1.513802 |

|   |           |           |           |
|---|-----------|-----------|-----------|
| O | -3.415138 | 1.513802  | -1.513802 |
| O | -1.513802 | 3.415138  | -1.513802 |
| O | 1.513802  | -3.415138 | -1.513802 |
| O | 1.513802  | 3.415138  | 1.513802  |
| O | -1.513802 | -3.415138 | 1.513802  |
| O | 3.738598  | 3.738598  | -0.181099 |
| O | -3.738598 | 3.738598  | 0.181099  |
| O | -3.738598 | -3.738598 | -0.181099 |
| O | 3.738598  | -3.738598 | 0.181099  |
| O | -0.181099 | 3.738598  | 3.738598  |
| O | 0.181099  | -3.738598 | 3.738598  |
| O | -0.181099 | -3.738598 | -3.738598 |
| O | 0.181099  | 3.738598  | -3.738598 |
| O | -3.738598 | -0.181099 | -3.738598 |
| O | 3.738598  | 0.181099  | -3.738598 |
| O | 3.738598  | -0.181099 | 3.738598  |
| O | -3.738598 | 0.181099  | 3.738598  |

Dawson  $P_2W_{18}O_{62}^{6-}$  D(3)

|   |           |           |           |
|---|-----------|-----------|-----------|
| P | 0.000000  | 0.000000  | -2.034766 |
| W | 0.097810  | 3.568708  | -1.758075 |
| W | 0.077412  | -3.561408 | -2.073823 |
| W | 1.983304  | -0.181758 | -5.013893 |
| W | 3.041687  | -1.869061 | -1.758075 |
| W | -1.149059 | -1.626713 | -5.013893 |
| W | -3.122976 | 1.713663  | -2.073823 |
| W | -3.139497 | -1.699648 | -1.758075 |
| W | -0.834245 | 1.808471  | -5.013893 |
| W | 3.045564  | 1.847745  | -2.073823 |
| O | 0.755185  | 1.293286  | -1.551594 |
| O | -1.497611 | 0.007367  | -1.551594 |
| O | 0.742426  | -1.300653 | -1.551594 |
| O | 0.000000  | 0.000000  | -3.653383 |
| O | -2.425131 | 1.648709  | -3.810878 |
| O | -2.454521 | -1.601677 | -3.692231 |
| O | 3.344592  | 0.013292  | -1.586060 |
| O | 2.640389  | 1.275870  | -3.810878 |
| O | -1.660785 | -2.903148 | -1.586060 |
| O | -0.159833 | 2.926516  | -3.692231 |
| O | -0.215259 | -2.924579 | -3.810878 |
| O | -1.683807 | 2.889856  | -1.586060 |
| O | 2.614354  | -1.324839 | -3.692231 |
| O | 3.055105  | 2.132923  | -0.072170 |
| O | -3.995403 | -0.002427 | -2.149964 |
| O | 3.055105  | -2.132923 | 0.072170  |
| O | -1.548043 | 0.086983  | -5.725089 |
| O | 1.995600  | 3.461334  | -2.149964 |

|   |           |           |           |
|---|-----------|-----------|-----------|
| O | 0.319613  | -3.712260 | -0.072170 |
| O | 0.849351  | 1.297153  | -5.725089 |
| O | -3.374718 | -1.579337 | 0.072170  |
| O | -3.374718 | 1.579337  | -0.072170 |
| O | 0.698692  | -1.384136 | -5.725089 |
| O | 0.319613  | 3.712260  | 0.072170  |
| O | 1.999803  | -3.458907 | -2.149964 |
| O | -0.189514 | 5.220261  | -2.208494 |
| O | -0.188856 | -5.260297 | -2.292583 |
| O | 3.223250  | -0.222778 | -6.228182 |
| O | 4.615636  | -2.446007 | -2.208494 |
| O | -1.804556 | -2.680028 | -6.228182 |
| O | -4.461123 | 2.793702  | -2.292583 |
| O | -4.426122 | -2.774255 | -2.208494 |
| O | -1.418694 | 2.902805  | -6.228182 |
| O | 4.649979  | 2.466595  | -2.292583 |
| P | 0.000000  | 0.000000  | 2.034766  |
| W | 0.077412  | 3.561408  | 2.073823  |
| W | 0.097810  | -3.568708 | 1.758075  |
| W | 1.983304  | 0.181758  | 5.013893  |
| W | 3.045564  | -1.847745 | 2.073823  |
| W | -0.834245 | -1.808471 | 5.013893  |
| W | -3.139497 | 1.699648  | 1.758075  |
| W | -3.122976 | -1.713663 | 2.073823  |
| W | -1.149059 | 1.626713  | 5.013893  |
| W | 3.041687  | 1.869061  | 1.758075  |
| O | 0.742426  | 1.300653  | 1.551594  |
| O | -1.497611 | -0.007367 | 1.551594  |
| O | 0.755185  | -1.293286 | 1.551594  |
| O | 0.000000  | 0.000000  | 3.653383  |
| O | -2.454521 | 1.601677  | 3.692231  |
| O | -2.425131 | -1.648709 | 3.810878  |
| O | 3.344592  | -0.013292 | 1.586060  |
| O | 2.614354  | 1.324839  | 3.692231  |
| O | -1.683807 | -2.889856 | 1.586060  |
| O | -0.215259 | 2.924579  | 3.810878  |
| O | -0.159833 | -2.926516 | 3.692231  |
| O | -1.660785 | 2.903148  | 1.586060  |
| O | 2.640389  | -1.275870 | 3.810878  |
| O | -3.995403 | 0.002427  | 2.149964  |
| O | -1.548043 | -0.086983 | 5.725089  |
| O | 1.999803  | 3.458907  | 2.149964  |
| O | 0.698692  | 1.384136  | 5.725089  |
| O | 0.849351  | -1.297153 | 5.725089  |
| O | 1.995600  | -3.461334 | 2.149964  |
| O | -0.188856 | 5.260297  | 2.292583  |
| O | -0.189514 | -5.220261 | 2.208494  |
| O | 3.223250  | 0.222778  | 6.228182  |
| O | 4.649979  | -2.466595 | 2.292583  |
| O | -1.418694 | -2.902805 | 6.228182  |

|   |           |           |          |
|---|-----------|-----------|----------|
| O | -4.426122 | 2.774255  | 2.208494 |
| O | -4.461123 | -2.793702 | 2.292583 |
| O | -1.804556 | 2.680028  | 6.228182 |
| O | 4.615636  | 2.446007  | 2.208494 |

Preyssler  $\text{NaP}_5\text{W}_{30}\text{O}_{110}^{14-}$  C5v

|    |           |           |           |
|----|-----------|-----------|-----------|
| Na | 0.000000  | 0.000000  | 0.923345  |
| P  | -3.613502 | 0.000000  | -0.010804 |
| W  | -3.257482 | 0.000000  | 3.473292  |
| W  | -5.974330 | -1.923249 | 1.712075  |
| W  | -5.974330 | 1.923249  | 1.712075  |
| O  | -2.716224 | 0.000000  | 1.268328  |
| O  | -4.563388 | -1.306522 | 0.007110  |
| O  | -4.563388 | 1.306522  | 0.007110  |
| O  | -6.477772 | 0.000000  | 1.628577  |
| O  | -4.590147 | 1.337550  | 2.903964  |
| O  | -4.590147 | -1.337550 | 2.903964  |
| O  | -6.893139 | -2.274018 | 0.007724  |
| O  | -6.893139 | 2.274018  | 0.007724  |
| O  | -1.927234 | -1.400218 | 3.602842  |
| O  | -5.052202 | -3.670639 | 1.616002  |
| O  | -3.759228 | 0.000000  | 5.175759  |
| O  | -7.296429 | -2.416646 | 2.813015  |
| O  | -7.296429 | 2.416646  | 2.813015  |
| P  | -1.116634 | -3.436645 | -0.010804 |
| W  | -1.006617 | -3.098049 | 3.473292  |
| W  | -0.017051 | -6.276242 | 1.712075  |
| W  | -3.675288 | -5.087608 | 1.712075  |
| O  | -0.839360 | -2.583283 | 1.268328  |
| O  | -0.167588 | -4.743777 | 0.007110  |
| O  | -2.652740 | -3.936302 | 0.007110  |
| O  | -2.001742 | -6.160727 | 1.628577  |
| O  | -2.690519 | -3.952163 | 2.903964  |
| O  | -0.146347 | -4.778815 | 2.903964  |
| O  | 0.032622  | -7.258475 | 0.007724  |
| O  | -4.292817 | -5.853055 | 0.007724  |
| O  | 0.736138  | -2.265600 | 3.602842  |
| O  | 1.929769  | -5.939219 | 1.616002  |
| O  | -1.161665 | -3.575238 | 5.175759  |
| O  | 0.043646  | -7.686101 | 2.813015  |
| O  | -4.553087 | -6.192531 | 2.813015  |
| P  | 2.923385  | -2.123963 | -0.010804 |
| W  | 2.635358  | -1.914700 | 3.473292  |
| W  | 5.963792  | -1.955682 | 1.712075  |
| W  | 3.702877  | -5.067564 | 1.712075  |
| O  | 2.197472  | -1.596557 | 1.268328  |
| O  | 4.459812  | -1.625294 | 0.007110  |
| O  | 2.923904  | -3.739290 | 0.007110  |

|   |           |           |           |
|---|-----------|-----------|-----------|
| O | 5.240628  | -3.807539 | 1.628577  |
| O | 2.927315  | -3.780122 | 2.903964  |
| O | 4.499699  | -1.615920 | 2.903964  |
| O | 6.913301  | -2.211967 | 0.007724  |
| O | 4.240033  | -5.891405 | 0.007724  |
| O | 2.382193  | 0.000000  | 3.602842  |
| O | 6.244865  | 0.000000  | 1.616002  |
| O | 3.041280  | -2.209619 | 5.175759  |
| O | 7.323404  | -2.333626 | 2.813015  |
| O | 4.482466  | -6.243841 | 2.813015  |
| P | 2.923385  | 2.123963  | -0.010804 |
| W | 2.635358  | 1.914700  | 3.473292  |
| W | 3.702877  | 5.067564  | 1.712075  |
| W | 5.963792  | 1.955682  | 1.712075  |
| O | 2.197472  | 1.596557  | 1.268328  |
| O | 2.923904  | 3.739290  | 0.007110  |
| O | 4.459812  | 1.625294  | 0.007110  |
| O | 5.240628  | 3.807539  | 1.628577  |
| O | 4.499699  | 1.615920  | 2.903964  |
| O | 2.927315  | 3.780122  | 2.903964  |
| O | 4.240033  | 5.891405  | 0.007724  |
| O | 6.913301  | 2.211967  | 0.007724  |
| O | 0.736138  | 2.265600  | 3.602842  |
| O | 1.929769  | 5.939219  | 1.616002  |
| O | 3.041280  | 2.209619  | 5.175759  |
| O | 4.482466  | 6.243841  | 2.813015  |
| O | 7.323404  | 2.333626  | 2.813015  |
| P | -1.116634 | 3.436645  | -0.010804 |
| W | -1.006617 | 3.098049  | 3.473292  |
| W | -3.675288 | 5.087608  | 1.712075  |
| W | -0.017051 | 6.276242  | 1.712075  |
| O | -0.839360 | 2.583283  | 1.268328  |
| O | -2.652740 | 3.936302  | 0.007110  |
| O | -0.167588 | 4.743777  | 0.007110  |
| O | -2.001742 | 6.160727  | 1.628577  |
| O | -0.146347 | 4.778815  | 2.903964  |
| O | -2.690519 | 3.952163  | 2.903964  |
| O | -4.292817 | 5.853055  | 0.007724  |
| O | 0.032622  | 7.258475  | 0.007724  |
| O | -1.927234 | 1.400218  | 3.602842  |
| O | -5.052202 | 3.670639  | 1.616002  |
| O | -1.161665 | 3.575238  | 5.175759  |
| O | -4.553087 | 6.192531  | 2.813015  |
| O | 0.043646  | 7.686101  | 2.813015  |
| W | -3.252722 | 0.000000  | -3.470072 |
| W | -5.976163 | 1.924181  | -1.712702 |
| W | -5.976163 | -1.924181 | -1.712702 |
| O | -2.773610 | 0.000000  | -1.313622 |
| O | -6.479350 | 0.000000  | -1.618577 |
| O | -4.608265 | -1.346885 | -2.909740 |

|   |           |           |           |
|---|-----------|-----------|-----------|
| O | -4.608265 | 1.346885  | -2.909740 |
| O | -1.936609 | 1.407029  | -3.614413 |
| O | -5.057319 | 3.674358  | -1.610119 |
| O | -3.782524 | 0.000000  | -5.167041 |
| O | -7.311310 | 2.420907  | -2.795763 |
| O | -7.311310 | -2.420907 | -2.795763 |
| W | -1.005146 | 3.093522  | -3.470072 |
| W | -0.016731 | 6.278274  | -1.712702 |
| W | -3.676741 | 5.089065  | -1.712702 |
| O | -0.857093 | 2.637860  | -1.313622 |
| O | -2.002229 | 6.162228  | -1.618577 |
| O | -2.704996 | 3.966510  | -2.909740 |
| O | -0.143068 | 4.798930  | -2.909740 |
| O | 0.739719  | 2.276621  | -3.614413 |
| O | 1.931724  | 5.945236  | -1.610119 |
| O | -1.168864 | 3.597395  | -5.167041 |
| O | 0.043101  | 7.701570  | -2.795763 |
| O | -4.561738 | 6.205367  | -2.795763 |
| W | 2.631507  | 1.911902  | -3.470072 |
| W | 5.965823  | 1.956006  | -1.712702 |
| W | 3.703813  | 5.069396  | -1.712702 |
| O | 2.243897  | 1.630287  | -1.313622 |
| O | 5.241905  | 3.808467  | -1.618577 |
| O | 2.936485  | 3.798323  | -2.909740 |
| O | 4.519844  | 1.619017  | -2.909740 |
| O | 2.393781  | 0.000000  | -3.614413 |
| O | 6.251191  | 0.000000  | -1.610119 |
| O | 3.060127  | 2.223312  | -5.167041 |
| O | 7.337947  | 2.338925  | -2.795763 |
| O | 4.492000  | 6.256035  | -2.795763 |
| W | 2.631507  | -1.911902 | -3.470072 |
| W | 3.703813  | -5.069396 | -1.712702 |
| W | 5.965823  | -1.956006 | -1.712702 |
| O | 2.243897  | -1.630287 | -1.313622 |
| O | 5.241905  | -3.808467 | -1.618577 |
| O | 4.519844  | -1.619017 | -2.909740 |
| O | 2.936485  | -3.798323 | -2.909740 |
| O | 0.739719  | -2.276621 | -3.614413 |
| O | 1.931724  | -5.945236 | -1.610119 |
| O | 3.060127  | -2.223312 | -5.167041 |
| O | 4.492000  | -6.256035 | -2.795763 |
| O | 7.337947  | -2.338925 | -2.795763 |
| W | -1.005146 | -3.093522 | -3.470072 |
| W | -3.676741 | -5.089065 | -1.712702 |
| W | -0.016731 | -6.278274 | -1.712702 |
| O | -0.857093 | -2.637860 | -1.313622 |
| O | -2.002229 | -6.162228 | -1.618577 |
| O | -0.143068 | -4.798930 | -2.909740 |
| O | -2.704996 | -3.966510 | -2.909740 |
| O | -1.936609 | -1.407029 | -3.614413 |



|   |           |           |           |
|---|-----------|-----------|-----------|
| O | -5.057319 | -3.674358 | -1.610119 |
| O | -1.168864 | -3.597395 | -5.167041 |
| O | -4.561738 | -6.205367 | -2.795763 |
| O | 0.043101  | -7.701570 | -2.795763 |
